# Supplementary material for: Chronotype and social jetlag influence human circadian clock gene expression
Source: PubMed Central journal article supplement (PMC6033857; doi:10.1038/s41598-018-28616-2), 2018-07-05
Supplement: 41598_2018_28616_MOESM1_ESM.pdf [file 41598_2018_28616_MOESM1_ESM.pdf]

# **Chronotype and social jetlag influence human circadian clock gene expression**

Masaki Takahashi, Yu Tahara, Miku Tsubosaka, Mayuko Fukazawa, Mamiho Ozaki, Tamao Iwakami, Takashi Nakaoka, Shigenobu Shibata

|                             | Low SJL group<br>(n =12) | High SJL group<br>(n =12) | P value |
|-----------------------------|--------------------------|---------------------------|---------|
| Age (years)                 | 27.3 ± 1.1               | 25.8 ± 1.3                | 0.391   |
| Height (cm)                 | 173.5 ± 1.5              | 172.1 ± 1.4               | 0.482   |
| Weight (kg)                 | 68.8 ± 1.8               | 67.3 ± 2.8                | 0.667   |
| BMI                         | 22.8 ± 0.5               | 22.7 ± 0.7                | 0.852   |
| MEQ score                   | 56.5 ± 2.8               | 42.6 ± 3.3**              | 0.004   |
| Wake-up time at weekday (h) | 7.0 ± 0.4                | 7.8 ± 0.4                 | 0.142   |
| Bedtime at weekday (h)      | 23.9 ± 0.4               | 24.7 ± 0.3                | 0.132   |
| Wake-up time at weekend (h) | 7.7 ± 0.5                | 10.4 ± 0.4*               | 0.011   |
| Bedtime at weekend (h)      | 24.2 ± 0.4               | 25.6 ± 0.3**              | 0.001   |
| Socail jetlag time (h)      | 0.5 ± 0.1                | 1.8 ± 0.1**               | 0.001   |

Table S1. Physical characteristics of low and high SJL groups.

All data are presented as means ± SE.

P value : un-paired t-test; between groups, \*P<0.05, \*\*P<0.01 vs SJL low group

| Breakfast |          | <i>NR1D1</i> | <i>NR1D2</i> | <i>PER3</i> |
|-----------|----------|--------------|--------------|-------------|
| Friday    | <i>r</i> | -0.009       | 0.403        | 0.444       |
|           | <i>p</i> | 0.974        | 0.109        | 0.074       |
| Monday    | <i>r</i> | 0.101        | -0.366       | -0.152      |
|           | <i>p</i> | 0.680        | 0.123        | 0.534       |

| Lunch  |          | <i>NR1D1</i> | <i>NR1D2</i> | <i>PER3</i> |
|--------|----------|--------------|--------------|-------------|
| Friday | <i>r</i> | 0.108        | 0.271        | 0.032       |
|        | <i>p</i> | 0.614        | 0.200        | 0.883       |
| Monday | <i>r</i> | -0.112       | 0.229        | 0.337       |
|        | <i>p</i> | 0.601        | 0.282        | 0.107       |

| Dinner |          | <i>NR1D1</i> | <i>NR1D2</i> | <i>PER3</i> |
|--------|----------|--------------|--------------|-------------|
| Friday | <i>r</i> | 0.068        | 0.469        | 0.267       |
|        | <i>p</i> | 0.751        | 0.021        | 0.206       |
| Monday | <i>r</i> | 0.410        | 0.536        | 0.576       |
|        | <i>p</i> | 0.052        | 0.008        | 0.004       |

Table S2. The correlations between peak time of each clock gene and time of breakfast, lunch, and dinner in Friday and Monday trials.

\* Breakfast in Friday trials n = 17, breakfast in Monday trials n = 19; \* Dinner in Monday trials n = 23
